# Supplementary material for: Clostridium difficile colonization and antibiotics response in PolyFermS continuous model mimicking elderly intestinal fermentation
Source: Springer Nature journal article supplement (doi:10.1186/s13099-016-0144-y), 2016-12-01

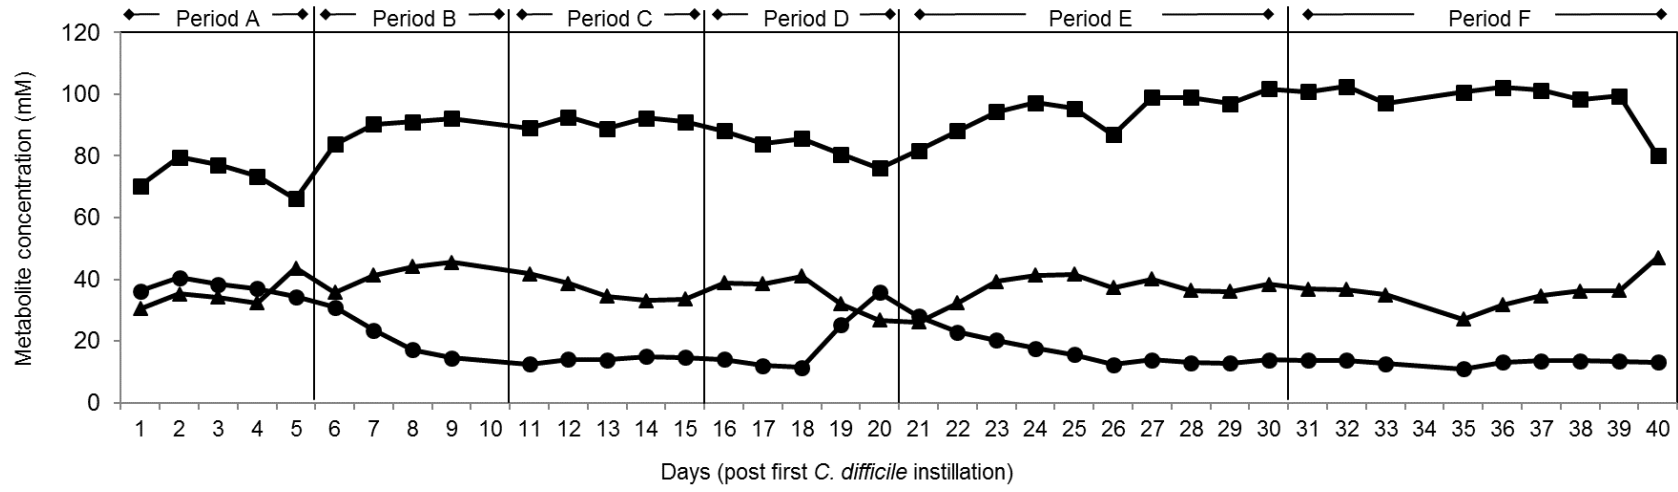

Supplement: MOESM3 [file 11106094]
